# Supplementary material for: Transcriptomes That Confer to Plant Defense against Powdery Mildew Disease in Lagerstroemia indica
Source: Int J Genomics. 2015 Jul 12;2015:528395. doi: 10.1155/2015/528395 (PMC4515301; doi:10.1155/2015/528395)
Supplement: Supplementary file 1 — Supplement Table S1. Primer sequence, annealing temperature and expected size from differentially expressed genes sequences. [file 528395.f1.xls]

## Sheet: Sheet1
Supplement Table S1. Primere sequence, annealing temperature and expected size from differentially expressed genes sequences.
Query Name	Primer Name	Left Primer	Right Primer	Left Primer TM (℃)	Right Primer TM (℃)	Product Size (bp)
>B.9985	cab-h1	CATGCATTCCACTGCTGAAG	CTCGATGATGTCTTGCTCCA	60.413	59.942	164
>B.8436	cab-h8	GCGGAGAAAGGAGGAAAACT	ACAATGGGGAGCTTAGGTCA	59.827	59.55	157
>T.9454	nat-h1	CCCTTCAGTCAGGCATTGAT	CACCAGCATTCTCCATAGCA	60.073	59.823	165
>B.7344	cab-rt1	GGACGATTTCAAGTCGAAGG	TATGACCATGAGGAAGGCGT	59.7	60.5	157
>B.2282	cab-rt2	GACTCAATTCCGTGGGTCAA	AGCACATCCACCATGTCCTT	60.903	60.395	164
>B.3011	cab-rt3	GCTCATGAAGCTGACCAACA	ATCGATGTTCTTGCAGACCC	59.992	60.081	166
>B.4839	cab-rt4	ACTCAAAGGCATTCTGACGG	ACAACTTCGGTCAACAGTCC	60.255	57.609	156
>B.18652	cab-rt5	TGGCTGATGAGATCGAGAGA	CTGCAAATAAGTGGTGGCCT	59.611	60.132	167
>B.21408	cab-rt6	CAAGTTGAGGGAATCACAGC	GGATAAACCTCGATGACGGA	58.287	59.894	165
>B.21856	cab-rt7	ATATTCTCACGCCACCTTCG	CTCAAAGGGTGAAACAGGGA	60.096	60.081	152
>B.22624	cab-rt8	TAAGTGACAAGGAGGACCGA	CAGAGACCTTAGCCCGAAAA	58.286	59.448	170
>B.22625	cab-rt9	TAAGTGACAAGGAGGACCGA	CAGAGACCTTAGCCCGAAAA	58.286	59.448	170
>B.23059	cab-rt10	TGTCCTTGAAATGTGCCCTC	TTTCGAAGAAGCCAGAGTGG	61.046	60.508	168
>T.3609	nat-rt1	ATGGAACCATGGCTTAGCTG	CATGAACCTGAGGAGGCAAT	60.1	60.1	166
>T.11148	nat-rt2	CTGCCCACAGGGAGAAAATA	CACCAACATCCACCAGAGAA	60.1	59.5	162
>T.11233	nat-rt3	TCCGTAACAATGATCCCACC	TAAACCTTCGAACACCGTCC	60.6	60	170
>T.11235	nat-rt4	AATCGGGAGCAGATGATGAC	GATCGTTGTTACGGAGCCAT	60	60	168
>T.12494	nat-rt5	GGTGTTAGCAACTTCGGCAT	TCCTCAGCATTTTCCACCTC	60.1	60.2	155
>T.13188	nat-rt6	GACTCAATTCCGTGGGTCAA	AGCACATCCACCATGTCCTT	60.9	60.4	164
>T.9497	nat-rt7	CGGGTTAGAAACGAGGTTGA	CTCCATTGCTTCCCGACTTA	60.1	60.2	153
>T.13192	nat-rt8	ACCGAAGATCTCCTCCATGT	CTTTGAGTTGCTGCCTTTCG	58.54	61.069	163
>T.13486	nat-rt9	ACCCTCAGGAGCAAACTCAA	TCTTTACCCAGTGCTTGGCT	59.844	59.875	167
>T.13811	nat-rt10	ATAATGAGAAGGGATCCGGG	CGACCTCATTTCTAACCCGA	60.11	60.066	162
>T.17520	nat-rt11	TTGTCGGGAGAAGGTTGTTC	CTTCAACTTCTTGGCGAACC	60.088	59.853	167
>T.6322	nat-rt12	AGGGAGAAGAAGAAGGAGGAGA	ATATCGGTATTGACCCGCTG	59.957	59.807	155
>T.8775	nat-rt13	TGGATGTGAGGGGAAATGAC	ATCCATGTTCAGCTTCTCCG	60.725	60.218	170
>T.9193	nat-rt14	ATGCCTTCCTCACGGTCATA	GCTTTGATGTCCGTATCGGT	60.483	59.962	151
>T.17643	nat-rt15	GAATTCCCAGGGATCAAGTG	TCCAGGCATGTAACATCAGC	59.336	59.679	154
>T.17644	nat-rt16	ATAATCGAGACCGATGACGG	TTAGTGCTGGCTCCAGTGAA	59.917	59.591	170
